# Supplementary material
Source: MDPI journal article supplement (https://www.mdpi.com/1424-2818/15/9/1022)
Supplement: s1 [file s1]

Table S1. Average monthly growth rate of corals (in cm) and of SST (in °C) with their standard errors.

|                  | <b>Dec</b> | <b>Jan</b> | <b>Feb</b> | <b>Mar</b> | <b>Apr</b> | <b>May</b> | <b>Jun</b> | <b>Jul</b> | <b>Aug</b> | <b>Sep</b> | <b>Oct</b> | <b>Nov</b> |
|------------------|------------|------------|------------|------------|------------|------------|------------|------------|------------|------------|------------|------------|
| <b>Growth</b>    |            | 0.28       | 0.38       | 0.29       | 0.19       | 0.09       | 0.20       | 0.31       | 0.34       | 0.31       | 0.30       | 0.34       |
| <b>Std. Err.</b> |            | 0.02       | 0.03       | 0.04       | 0.02       | 0.01       | 0.03       | 0.04       | 0.03       | 0.03       | 0.03       | 0.03       |
| <b>T°</b>        | 28.68      | 29.09      | 29.11      | 29.45      | 30.01      | 29.26      | 29.36      | 28.64      | 28.30      | 28.28      | 28.08      |            |
| <b>Std. Err.</b> | 0.13       | 0.06       | 0.05       | 0.16       | 0.07       | 0.16       | 0.07       | 0.16       | 0.15       | 0.14       | 0.13       |            |

Table S2. Monthly number of dead, diseased, and parasitized corals.

|                           | <b>Dec</b> | <b>Jan</b> | <b>Feb</b> | <b>Mar</b> | <b>Apr</b> | <b>May</b> | <b>Jun</b> | <b>Jul</b> | <b>Aug</b> | <b>Sep</b> | <b>Oct</b> | <b>Nov</b> |
|---------------------------|------------|------------|------------|------------|------------|------------|------------|------------|------------|------------|------------|------------|
| <b>Dead corals</b>        | 0          | 0          | 17         | 6          | 12         | 1          | 4          | 4          | 3          | 3          | 19         | 3          |
| <b>Diseased corals</b>    | 0          | 23         | 19         | 22         | 6          | 20         | 9          | 11         | 1          | 9          | 2          | 6          |
| <b>Parasitized corals</b> | 12         | 19         | 33         | 36         | 10         | 17         | 20         | 9          | 3          | 8          | 5          | 1          |

Table S3. Monthly number of coral fragments for each healthy category.

|            | <b>100% living tissue</b> | <b>99%-50% living tissue</b> | <b>&lt; 50% living tissue</b> | <b>Paled/Bleached</b> |
|------------|---------------------------|------------------------------|-------------------------------|-----------------------|
| <b>Dec</b> | 200                       | 26                           | 17                            | 91                    |
| <b>Jan</b> | 206                       | 31                           | 7                             | 35                    |
| <b>Feb</b> | 195                       | 29                           | 2                             | 3                     |
| <b>Mar</b> | 122                       | 88                           | 10                            | 17                    |
| <b>Apr</b> | 129                       | 72                           | 7                             | 38                    |
| <b>May</b> | 116                       | 79                           | 12                            | 24                    |
| <b>Jun</b> | 108                       | 85                           | 10                            | 3                     |
| <b>Jul</b> | 98                        | 80                           | 21                            | 0                     |
| <b>Aug</b> | 85                        | 90                           | 22                            | 0                     |
| <b>Sep</b> | 73                        | 86                           | 32                            | 1                     |
| <b>Oct</b> | 65                        | 80                           | 27                            | 0                     |
| <b>Nov</b> | 61                        | 74                           | 34                            | 0                     |
